# Supplementary material for: Ceramide present in cholangiocarcinoma-derived extracellular vesicle induces a pro-inflammatory state in monocytes.
Source: Research Square preprint supplement (doi:10.21203/rs.3.rs-2499429/v1), 2023-01-27
Supplement: Supplementary file 1 [file 0404f6ae9504fc5ea589084c.pdf]

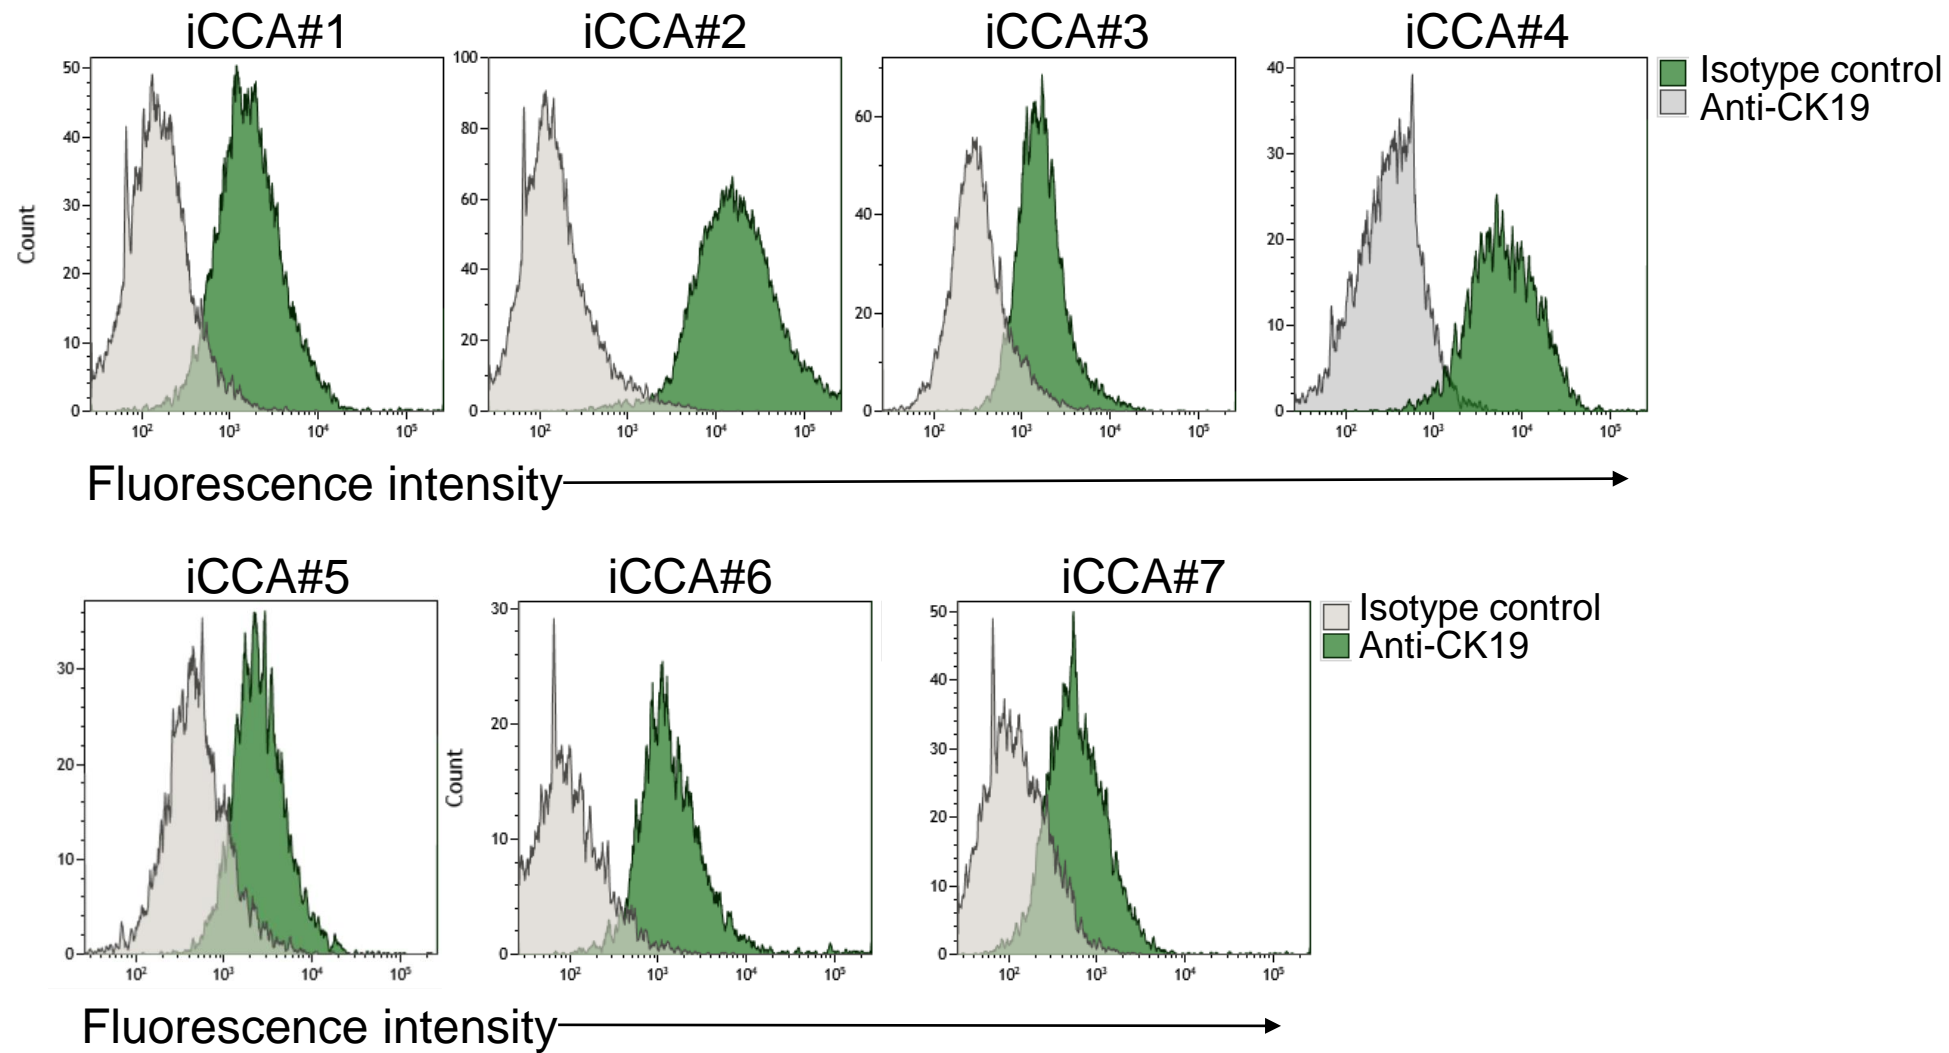

**Supplementary figure 1.** Cytokeratin 19 (CK19) expression on representative iCCA patients-derived cell cultures

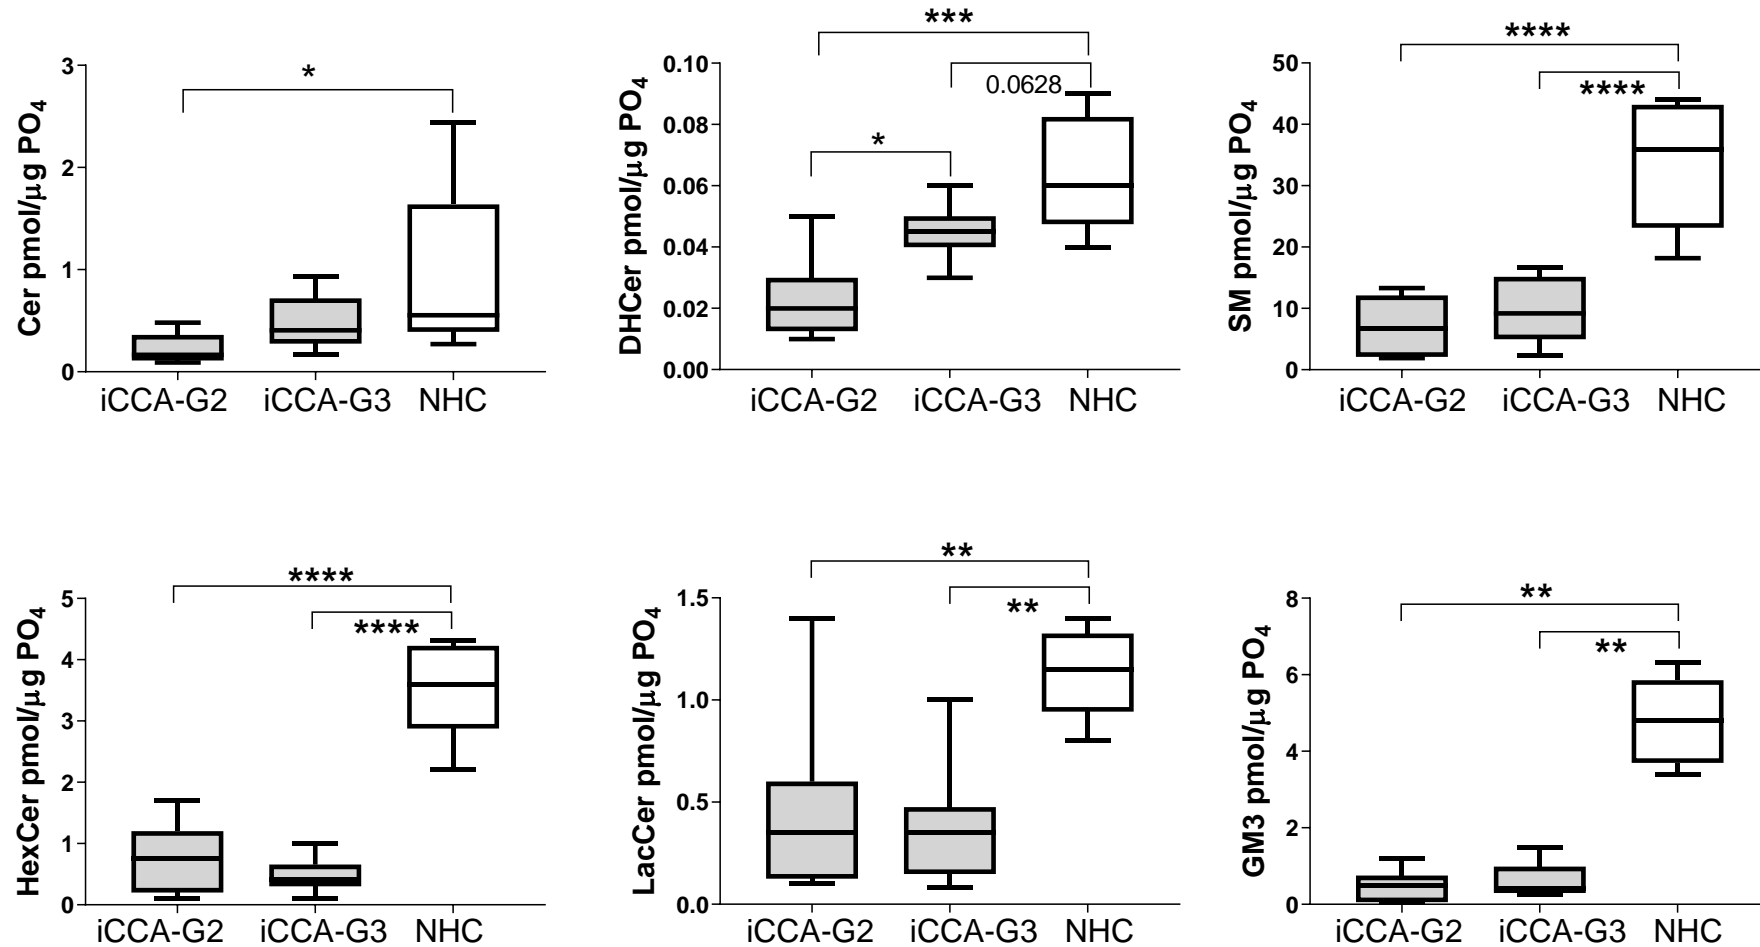

**Supplementary Figure 2.** EV-SPL expression in iCCA-G2, iCCA-G3 and NHC. iCCA samples were stratified according to tumor grade. G2, moderately-differentiated tumors (n = 8); G3, poorly-differentiated tumors (n = 8). Middle bars represent median values; box plots are 25% and 75% percentiles; whiskers are minimum and maximum values.

\*p <0.05, \*\*p <0.01, \*\*\*p <0.001, \*\*\*\*p <0.0001. The one-way ANOVA and Tukey's multiple comparisons tests were used to compare data except for GM3 in which Dunn's multiple comparisons test was used.

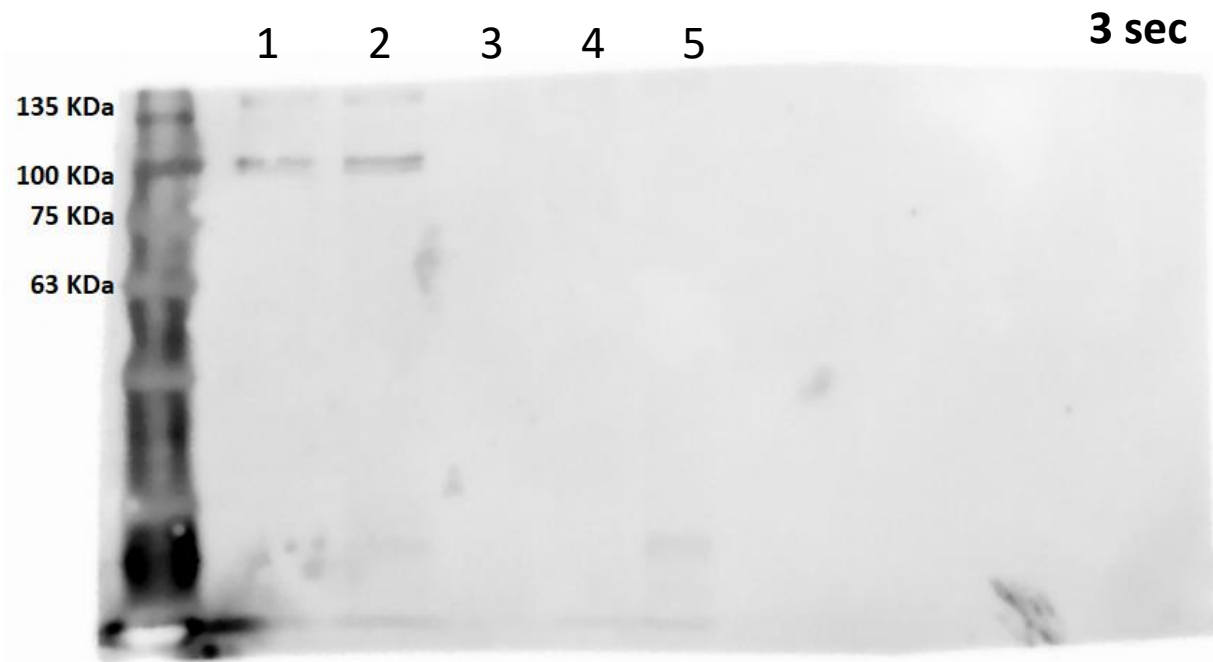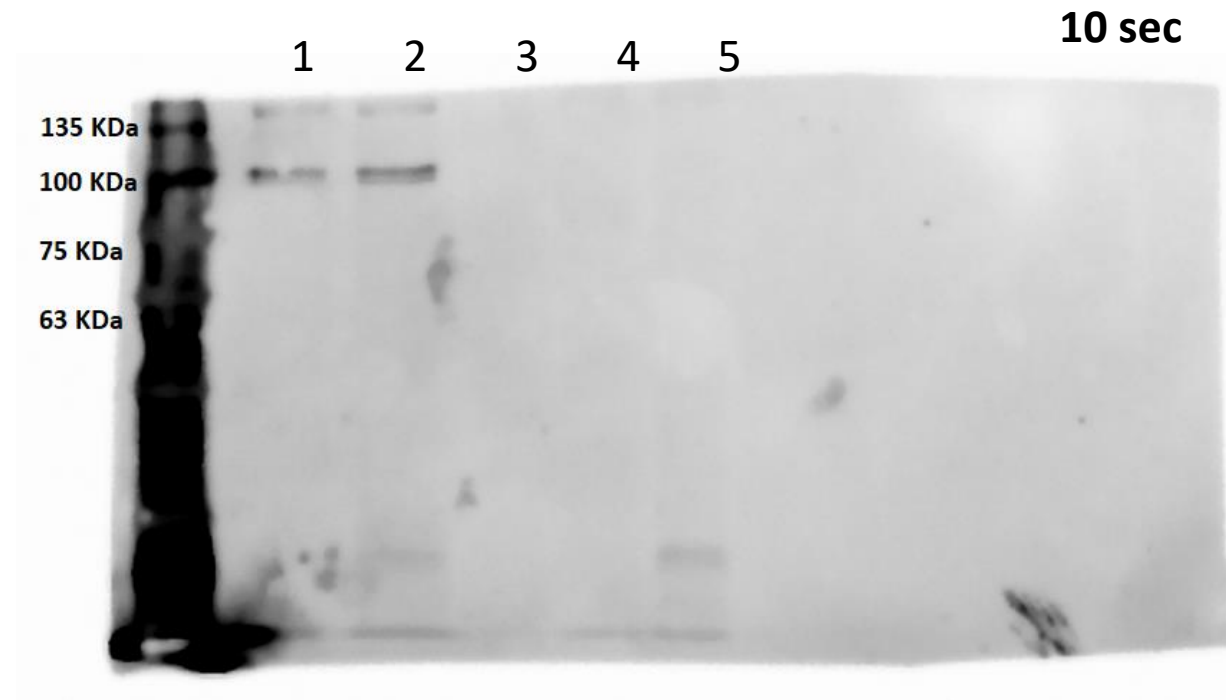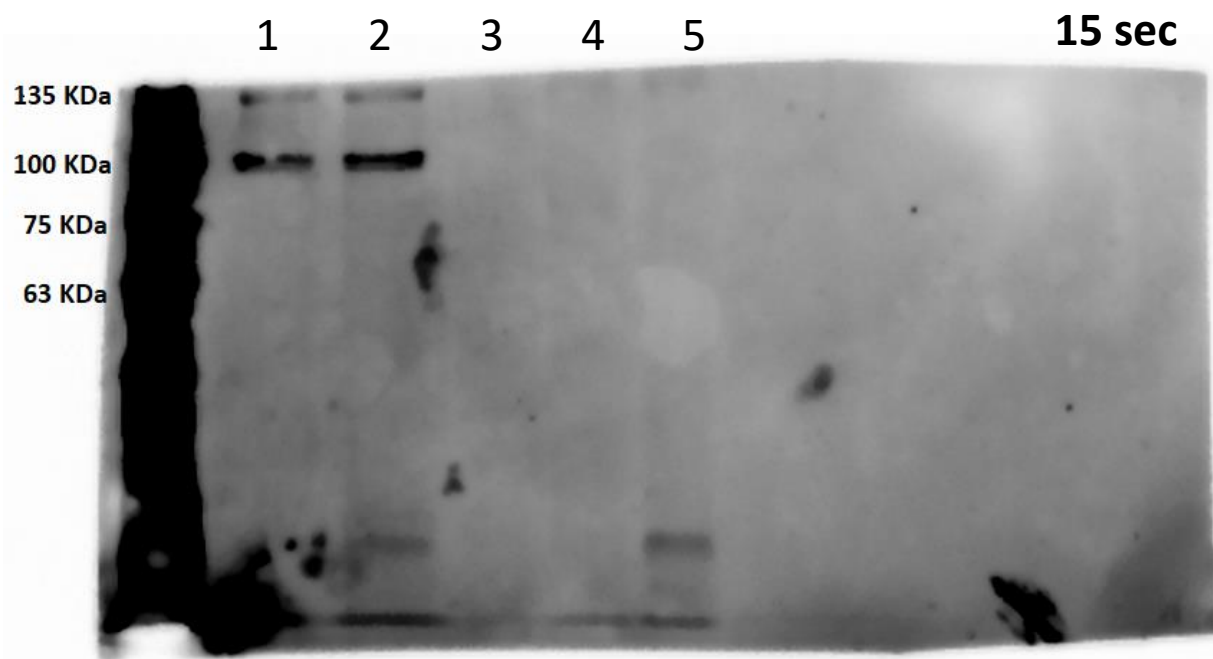

**Supplementary Figure 3.** Original, uncropped blots shown in figure 1 at multiple exposures (3, 10 and 15 seconds). lane 1= 15  $\mu$ g protein extract from primary iCCA cell line; lane 2= 15  $\mu$ g protein extract from NHC; lane 3-4 and 5= 5  $\mu$ g protein extract from primary iCCA cell lines.
